# Supplementary material
Source: PubMed Central journal article supplement (PMC4902581)
Supplement: supp_pp.15.01796_PP2015-01796R3_Supplemental_Material.pdf [file supp_pp.15.01796_PP2015-01796R3_Supplemental_Material.pdf]

## Supplemental Data

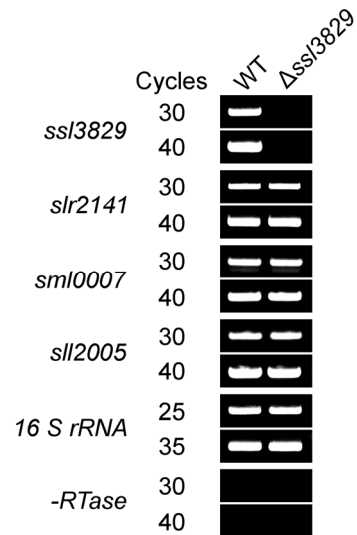

**Supplemental Figure S1.** RT-PCR analysis of *ss/3829* and its neighboring genes in the WT and  $\Delta ss/3829$  strains. WT loci of *ss/3829* and its neighboring genes are indicated in Fig. 1C. The transcript level of 16 S rRNA in each sample is shown as a control. The absence of contamination of DNA was confirmed by PCR without reverse transcriptase.

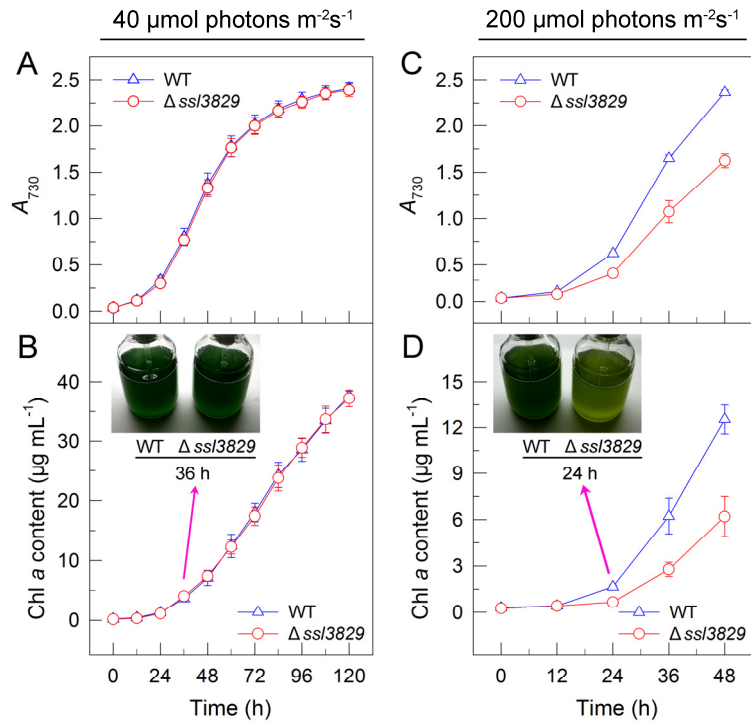

**Supplemental Figure S2.** Growth of WT and  $\Delta\text{ssl3829}$  cells under different light intensities. Cell density (A) and Chl *a* content (B) were monitored under normal light ( $40 \mu\text{mol photons m}^{-2}\text{s}^{-1}$ ). Cell density (C) and Chl *a* content (D) were monitored under high light ( $200 \mu\text{mol photons m}^{-2}\text{s}^{-1}$ ). Values are means  $\pm$  SD ( $n = 5$ ).

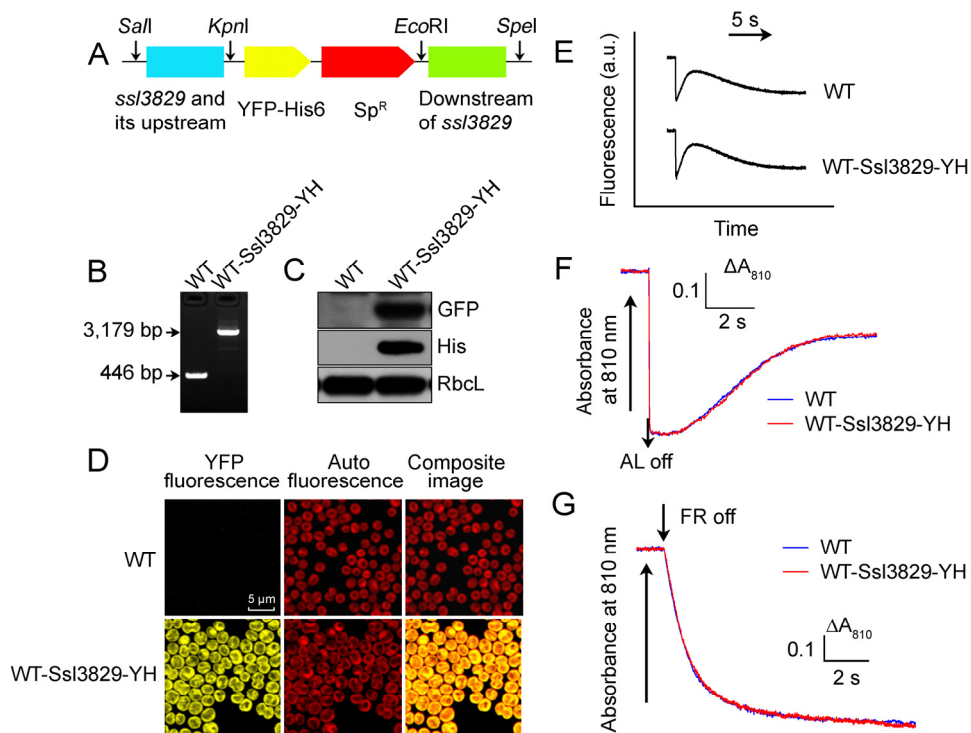

**Supplemental Figure S3.** Construction and characterization of WT-Ssl3829-YH strain. A, Construction of plasmid to generate WT-Ssl3829-YH mutant. A DNA fragment containing *ssl3829* and its upstream region amplified by PCR was ligated to the *SalI* and *KpnI* sites of the pEYFP-His6- $Sp^R$  plasmid and a fragment downstream of *ssl3829* was ligated between *EcoRI* and *SpeI* sites. The plasmid thus constructed was used to transform WT cells to generate the tagged mutant. B, PCR segregation analysis of the WT-Ssl3829-YH mutant using the *ssl3829-yfp-his6*-E and -F primer sequences (Supplemental Table S1). C, Western analysis of proteins from the WT and WT-Ssl3829-YH strains using GFP and His antibodies. Total protein corresponding to 1  $\mu$ g Chl *a* was loaded onto each lane, and detection of RbcL was detected as a loading control. D, Confocal microscopy analysis of WT and WT-Ssl3829-YH cells. The scale bar indicates 5  $\mu$ m. E, Monitoring of NDH-CET activity by Chl fluorescence. F, Redox kinetics of P700 after termination of actinic light (AL) illumination (800  $\mu$ Em<sup>-2</sup>s<sup>-1</sup> for 30 s) under a background of far-red light (FR). G, Kinetics of P700<sup>+</sup> re-reduction in darkness after turning off FR with a maximum at 720 nm in the presence of 10  $\mu$ M DCMU. The Chl *a* concentration was adjusted to 20  $\mu$ g/mL before measurement, and curves are normalized to the maximal signal. See Experimental Procedures for details.

```

Ssl3829 -----MVDPLMY-----EEMFVFLADQPSFPLPARM 30
CRR7  M E C S L Q K L F N N G D K L F S S R H N R R V S I E Q V H V T D S L S V N S I N L F H K P I C Y P I S S I L T S R K S H F S V C A T R R R R V H S N S D T V V L L A G Q D E Q F V I E D E L K 100
ruler 1.....10.....20.....30.....40.....50.....60.....70.....80.....90.....100

*** * : : * * * * : : * . : . * * * : * : * : * * * * *
Ssl3829 AKL E E I L A S Y D L P - L P Q G L K L P L L A A K A S H L R D N W C D L D R - G D G G W W W V V R L E K 85
CRR7  A K L R G W L E N W P V N L P P D L A R E D D L D E A V D F L V K A V C H L E I D G E V G S Y G M L V R L E - 156
ruler .....110.....120.....130.....140.....150.....

```

**Supplemental Figure S4.** Sequence comparison between Ssl3829 (*Synechocystis* sp. strain PCC 6803) and CRR7 (*Arabidopsis thaliana*) (At5g39210). The sequences were aligned using ClustalX 1.83. Asterisks indicate identical amino acids; colons and dots indicate conserved amino acid substitutions.

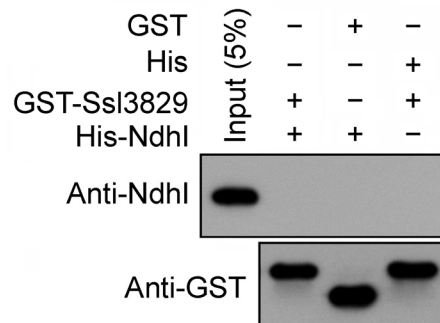

**Supplemental Figure S5.** GST-pulldown assay shows no interaction between Ssl3829 and NdhI. The expressed proteins were mixed and incubated with Glutathione Sepharose 4B beads on a rotating shaker at 4°C overnight. After washing, interaction of GST-Ssl3829 with His-NdhI was detected using the antibody against NdhI. The interactions of GST (without Ssl3829) with His-NdhI and of His (without NdhI) with GST-Ssl3829 were used as negative controls. The left lane represents input (5%) control.

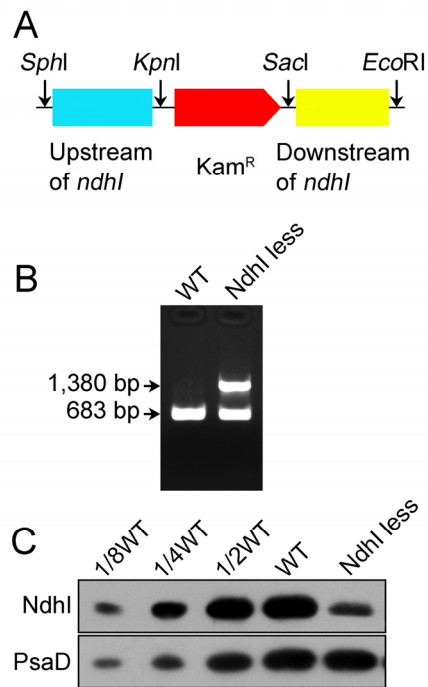

**Supplemental Figure S6.** Deletion mutation and molecular identification of *ndhI* gene. A, Construction of plasmid used to generate the *ndhI* deletion mutant ( $\Delta ndhI$ ). B, PCR segregation analysis of the  $\Delta ndhI$  mutant using the *ndhI*-G and *ndhI*-H primer sequences (Supplemental Table S1). C, Immunoblotting analysis of NdhI from the total protein of WT (including indicated serial dilutions) and NdhI-less mutant. Total protein corresponding to 1  $\mu$ g Chl *a* was loaded onto each lane, and PsaD was detected as a loading control.

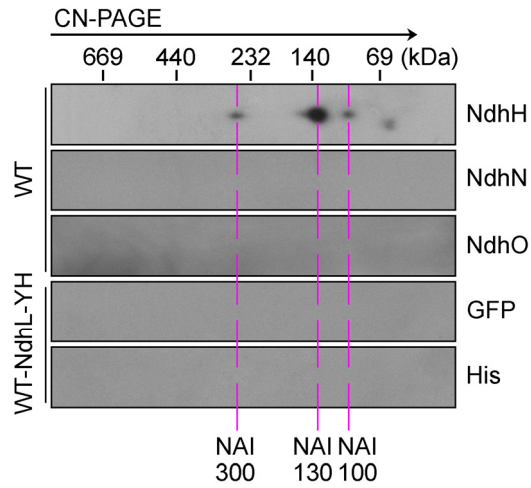

**Supplemental Figure S7.** Analysis of NdhL, NdhN and NdhO in NAIs in the cytoplasm. Cytoplasmic protein complexes isolated from the wild type (WT) and WT-NdhL-YH were separated by CN-PAGE followed by 2D SDS-PAGE. Proteins were immunodetected with the specific antibodies indicated. Dashed lines indicate the positions of NAIs.

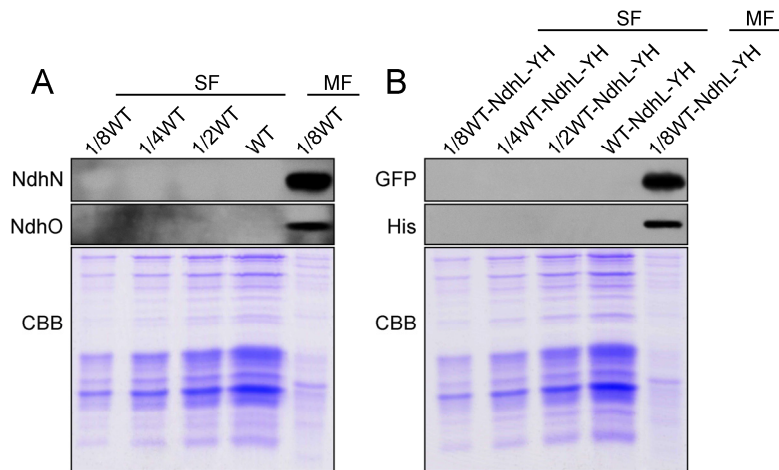

**Supplemental Figure S8.** Comparison of NdhL, NdhN and NdhO protein abundances between soluble and membrane fractions. Cytoplasmic proteins were isolated from the WT (A) and WT-NdhL-YH (B) strains, and immunoblotting analyses were performed with the indicated antibodies. Cytoplasmic proteins (80  $\mu$ g) were loaded on each well (100%), and total membrane proteins (10  $\mu$ g) were also analyzed. In the lower panel, a replicate gel stained with Coomassie Brilliant Blue (CBB) was used as a loading control.



**Supplemental Table S1.** Primers used in this study.

Primers used for identifying the sites of transposon insertion.

| Name           | Primer sequence (5'–3')   | Purpose                                    |
|----------------|---------------------------|--------------------------------------------|
| Transprimer-FP | ACCTACAACAAAGCTCTCATCAACC | Identifying the transposon insertion sites |
| Transprimer-RP | GCAATGTAACATCAGAGATTTTGAG |                                            |

Primers used to construct the pUC- $\Delta$ *ssl3829* vector.

| Name              | Primer sequence (5'–3')    | Purpose                            |
|-------------------|----------------------------|------------------------------------|
| <i>ssl3829</i> -A | CGGAATTCCCATCCACCAAAGGAGC  | Amplification of upstream region   |
| <i>ssl3829</i> -B | GGGGTACCGTACATCAGTGGATCGAC |                                    |
| <i>ssl3829</i> -C | CGGGATCCGGGGGGGGGGGAAAG    | Amplification of kanamycin gene    |
| <i>ssl3829</i> -D | GGGGTACCGGGGGGGGGGGCG      |                                    |
| <i>ssl3829</i> -E | CGGGATCCTTGGCAATGGTATGTGG  | Amplification of downstream region |
| <i>ssl3829</i> -F | GCGTCGACTCCCAAGAGAGTATCAC  |                                    |
| <i>ssl3829</i> -G | CGGAATTCATGGTCGATCCACTG    | Segregation analysis               |
| <i>ssl3829</i> -H | CCCTCGAGCTATTTTCCAGACG     |                                    |

Primers used to construct pUC- $\Delta$ *ndhI* vector.

| Name           | Primer sequence (5'–3')   | Purpose                            |
|----------------|---------------------------|------------------------------------|
| <i>ndhI</i> -A | GGCATGCGAAGCTGTTTTGGATTCC | Amplification of upstream region   |
| <i>ndhI</i> -B | GGGTACCCCTACCTGTTTGAGAATG |                                    |
| <i>ndhI</i> -C | GGGGTACCGGGGGGGGGGAAAG    | Amplification of kanamycin gene    |
| <i>ndhI</i> -D | AACGAGCTCGGGGGGGGGGGCGC   |                                    |
| <i>ndhI</i> -E | CGAGCTCTGAAAGCAGAATAGGTTG | Amplification of downstream region |
| <i>ndhI</i> -F | CGGAATTCTAGCACGATCGCCAGAC |                                    |
| <i>ndhI</i> -G | CTTCTAACTTTGGCCGACTTAAACC | Segregation analysis               |
| <i>ndhI</i> -H | ACGAGTTTACTTTAACGGGTAAAGC |                                    |

Primers used for the pEYFP-Ssl3829-YFP-His6 plasmid construction.

| Name                      | Primer sequence (5'–3')     | Purpose                                                 |
|---------------------------|-----------------------------|---------------------------------------------------------|
| <i>ssl3829-yfp-his6-A</i> | GCGTCGACAATCTAACCCCTGGTTG   | Amplification of <i>ssl3829</i> and its upstream region |
| <i>ssl3829-yfp-his6-B</i> | GGGTACCCCTTTTTCCAGACGTACCAC |                                                         |
| <i>ssl3829-yfp-his6-C</i> | GGAATTCCTTGATCGATCCCATCTC   | Amplification of downstream region                      |
| <i>ssl3829-yfp-his6-D</i> | GGACTAGTATACGCATCCACACACC   |                                                         |
| <i>ssl3829-yfp-his6-E</i> | CAGTGCCAATCTCCACCTC         | Segregation analysis                                    |
| <i>ssl3829-yfp-his6-F</i> | CGTGGTCGTCATGGTCAC          |                                                         |

Primers used for identifying the segregation of *ssl3829-yfp-his6* in  $\Delta$ *slr1097* mutant.

| Name                      | Primer sequence (5'–3') |
|---------------------------|-------------------------|
| <i>ssl3829-yfp-his6-E</i> | CAGTGCCAATCTCCACCTC     |
| <i>ssl3829-yfp-his6-F</i> | CGTGGTCGTCATGGTCAC      |

Primers used for RT-PCR.

| Name              | Primer sequence (5'–3')   | Purpose                   |
|-------------------|---------------------------|---------------------------|
| <i>ssl3829-FP</i> | GGTCGATCCACTGATGTACC      | <i>ssl3829</i> transcript |
| <i>ssl3829-RP</i> | CATTGCCAAGTACCGCCATC      |                           |
| <i>slr2141-FP</i> | GCAGCAACGGGGTATTGAAGCCA   | <i>slr2141</i> transcript |
| <i>slr2141-RP</i> | GGAAAATTGTGCTCCCGCTGTTAG  |                           |
| <i>sml0007-FP</i> | ATGGATTGGCGTGTAATTGTAGTTG | <i>sml0007</i> transcript |
| <i>sml0007-RP</i> | CTAGGCTTCGCGACCTAAAACGTCC |                           |
| <i>sll2005-FP</i> | CAAGGTTACGTTGGACAATGGTGAG | <i>sll2005</i> transcript |
| <i>sll2005-RP</i> | CGCTCATTTCGTCGAAACTCAGG   |                           |
| <i>slr1097-FP</i> | CAGAGATTCCCGAAGTTC        | <i>slr1097</i> transcript |
| <i>slr1097-RP</i> | CCAAATCGTAGCCCAACAG       |                           |

|                     |                        |                             |
|---------------------|------------------------|-----------------------------|
| <i>16 S rRNA-FP</i> | CGACTGCTAATACCCAATGTGC | <i>16 S rRNA</i> transcript |
| <i>16 S rRNA-RP</i> | GTCCCTCAGTGTCAGTTTCAGC |                             |

Primers used to construct vectors to express NdhN protein to raise antibody.

| Name           | Primer sequence (5'–3')  | Purpose       |
|----------------|--------------------------|---------------|
| <i>ndhN-FP</i> | CGGGATCCATGTTGCCATTGCCA  | NdhN antibody |
| <i>ndhN-RP</i> | CGGAATTCCTAGGCCGCCTGCAAG |               |

Primers used to construct the yeast two-hybrid vector.

| Name              | Primer sequence (5'–3')           | Purpose   |
|-------------------|-----------------------------------|-----------|
| <i>ssl3829-FP</i> | CGGAATTCATGGTCGATCCACTG           | Ssl3829   |
| <i>ssl3829-RP</i> | CCCTCGAGCTATTTTTCCAGACG           | bait      |
| <i>ndhO-FP</i>    | CGGAATTCATGGCCGCTAAAATGAAAAAGG    | NdhO bait |
| <i>ndhO-RP</i>    | CCCCTCGAGCTAAGCCAGGGCTTCGATTTGG   |           |
| <i>slr1097-FP</i> | CCTCGAGATGGTCACCATCACCGTTAC       | Slr1097   |
| <i>slr1097-RP</i> | CCTCGAGCTACAACCTGGGCCAAAAAATTG    | prey      |
| <i>ndhB-FP</i>    | CCCCTCGAGATGGACTTTTCTAGTAACGTTGCA | NdhB prey |
| <i>ndhB-RP</i>    | CCCCTCGAGCTAGGGTAAATCATGGGAAATGGC |           |
| <i>ndhI-FP</i>    | CCCCTCGAGATGTTTAACAACATTCTCAAACAG | NdhI prey |
| <i>ndhI-RP</i>    | CCCCTCGAGCTATTCTGCTTTCACCAAATCTTC |           |

Primers used to construct the fusion protein expression vector.

| Name              | Primer sequence (5'–3')         | Purpose                            |
|-------------------|---------------------------------|------------------------------------|
| <i>ssl3829-FP</i> | CGGAATTCATGGTCGATCCACTG         | Purifying Ssl3829<br>using GST-tag |
| <i>ssl3829-RP</i> | CCCTCGAGCTATTTTTCCAGACG         |                                    |
| <i>slr1097-FP</i> | CGGGATCCATGGTCACCATCACCC        | Purifying Slr1097<br>using His-tag |
| <i>slr1097-RP</i> | GCGTCGACCTACAACCTGGGCCAAAAAATTG |                                    |
| <i>ndhI-FP</i>    | CGGGATCCATGTTTAACAACATTC        | Purifying NdhI<br>using His-tag    |
| <i>ndhI-RP</i>    | CGAGCTCCTATTCTGCTTTCACCAAATC    |                                    |
